# Supplementary material for: Acute effects of singing on cardiovascular biomarkers
Source: Frontiers journal article supplement (doi:10.3389/fcvm.2022.869104), 2022-07-18

**Supplementary Table 1.** Observed singing effort rating

| <b>Numerical Rating</b> | <b>Effort</b> | <b>Examples</b>                                                |
|-------------------------|---------------|----------------------------------------------------------------|
| 1                       | Very little   | Talking and/or not following lyrics                            |
| 2                       | Light         | Singing some lyrics and/or singing with a quiet voice          |
| 3                       | Some          | Singing and hitting most of the lyrics with singing or humming |
| 4                       | Moderate      | Singing lyrics throughout entire video                         |
| 5                       | Maximal       | Singing loudly, very focused, and following all lyrics well    |

**Supplementary Figure 1.** Heart rate patterns before, during, and after singing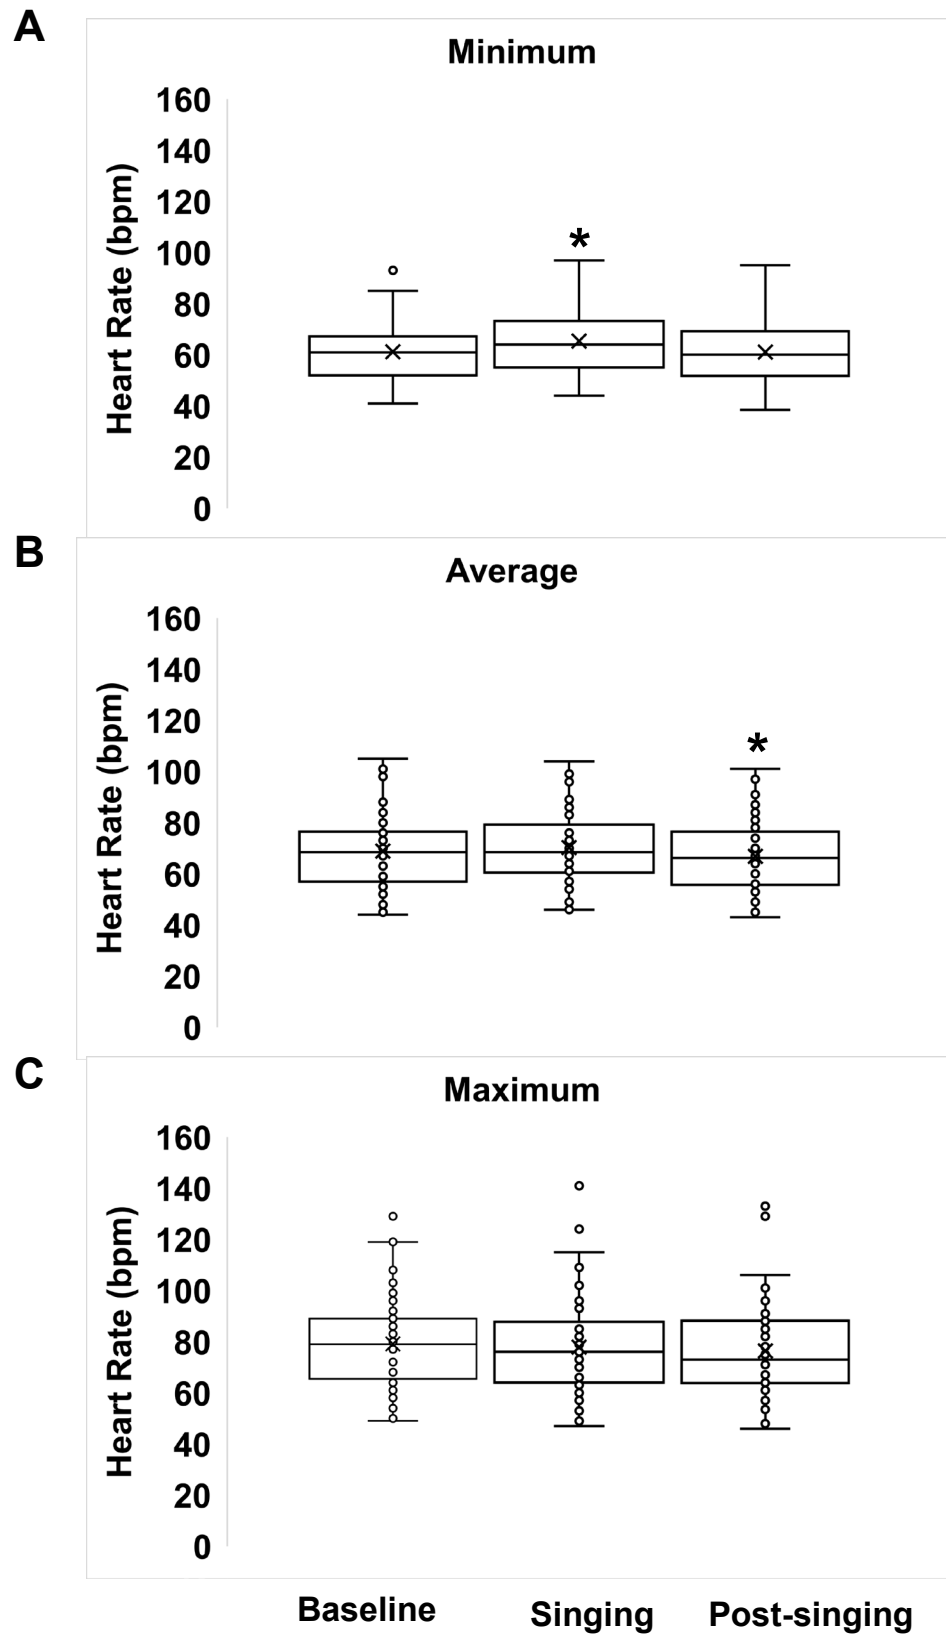

Supplement: Data_Sheet_1.pdf [file Data_Sheet_1.pdf]
